# Supplementary material
Source: PubMed Central journal article supplement (PMC6838835)
Supplement: DS1_JVDI_10.1177_1040638718823046.pdf [file DS1_JVDI_10.1177_1040638718823046.pdf]

**Supplementary Table 1.** Summary of matrices tested, requested pathogens and testing, and test methods used from 2 case investigations.

| Case investigation       | Source                                           | Matrix                                        | Requested testing                                          | Method                                                                                                                                                                                                                                         |
|--------------------------|--------------------------------------------------|-----------------------------------------------|------------------------------------------------------------|------------------------------------------------------------------------------------------------------------------------------------------------------------------------------------------------------------------------------------------------|
| 1                        | Cats 1–4                                         | Feces                                         | <i>Salmonella</i> sp. screening‡                           | Enriched culture and MALDI-TOF MS (Bruker Daltonics, Billerica, MA) confirmed                                                                                                                                                                  |
|                          |                                                  |                                               | <i>Listeria</i> sp. screening‡                             | Enriched culture                                                                                                                                                                                                                               |
|                          | Feces                                            | <i>Salmonella</i> isolate                     | MIC‡, serotyping‡, whole genome sequencing (WGS)‡          | Sensititre companion animal MIC plate (Thermo Fisher Scientific, Waltham, MA); <i>Salmonella</i> In Silico Typing Resource (SISTR); Nextera XT library preparation kit (Illumina, San Diego, CA) and MiSeq v2 (250×250) reagent kit (Illumina) |
|                          | Food 1† <sup>A</sup> and foods 2–6* <sup>B</sup> | Raw pet foods                                 | <i>Salmonella</i> sp. screening§                           | VIDAS (bioMérieux, Durham, NC) <i>Salmonella</i> screen (AOAC OMA 2004.03 <sup>2</sup> ) and culture confirmed (FDA BAM <i>Salmonella</i> <sup>1</sup> )                                                                                       |
|                          |                                                  |                                               | <i>Listeria</i> sp. screening§                             | VIDAS (bioMérieux) <i>Listeria</i> sp. screen (AOAC OMA 999.06 <sup>2</sup> ) and culture confirmed (FDA BAM <i>Listeria</i> <sup>4</sup> )                                                                                                    |
|                          | Food                                             | <i>Salmonella</i> isolates                    | Serotyping‡, WGS‡                                          | Same as case 1 feces isolates                                                                                                                                                                                                                  |
| <i>Listeria</i> isolates |                                                  | WGS‡                                          | Same as case 1 feces isolates                              |                                                                                                                                                                                                                                                |
| 2                        | Dog 1                                            | Tissue                                        | <i>Salmonella</i> culture and aerobic culture <sup>1</sup> | Enriched culture ( <i>Salmonella</i> ); direct culture ( <i>Escherichia coli</i> ); both were MALDI-TOF MS (Vitek MS, bioMérieux) confirmed                                                                                                    |
|                          | Tissue                                           | <i>Salmonella</i> and <i>E. coli</i> isolates | Serotyping‡, WGS‡                                          | Same as case 1 feces isolates                                                                                                                                                                                                                  |

|                                                               |                                             |                                                                   |                                                                                                                                       |
|---------------------------------------------------------------|---------------------------------------------|-------------------------------------------------------------------|---------------------------------------------------------------------------------------------------------------------------------------|
| Foods 7† <sup>C</sup> , 8* <sup>C</sup> , and 9† <sup>C</sup> | Raw pet foods                               | <i>Salmonella</i> , <i>E. coli</i> , and <i>Listeria</i> culture# | Culture by FDA BAM for <i>Salmonella</i> , <sup>1</sup> <i>E. coli</i> , <sup>3</sup> and <i>Listeria</i> , <sup>4</sup> respectively |
| Food                                                          | <i>Salmonella</i> isolates                  | Serotyping#, WGS#                                                 | Serotyping by FDA BAM for <i>Salmonella</i> <sup>1</sup> ; WGS as previously described <sup>5</sup>                                   |
|                                                               | <i>E. coli</i> and <i>Listeria</i> isolates | WGS#                                                              | WGS as previously described <sup>5</sup>                                                                                              |

A, B, C = manufacturer A, B, and C, respectively.

\* Purchased food.

† Food collected from complainant.

‡ Performed by the Animal Disease Diagnostic Laboratory of the Ohio Department of Agriculture.

§ Performed by Consumer Protection Laboratory of the Ohio Department of Agriculture.

¶ Performed by the Athens Veterinary Diagnostic Laboratory at the University of Georgia College of Veterinary Medicine.

# Performed by the FDA Office of Regulatory Affairs Laboratory. WGS results were uploaded to GenBank

(<https://www.ncbi.nlm.nih.gov/genbank/>).

¶¶ *Salmonella* In Silico Typing Resource (<https://lfz.corefacility.ca/sistr-app/>).

## References

1. Andrews WH, et al. Chapter 5: *Salmonella*. In: Bacteriological Analytical Manual. Online edition. Silver Spring, MD: US FDA, 2018.

2. AOAC International. Official Methods of Analysis. 17th ed. Gaithersburg, MD: AOAC International, 2000. Method 999.06-Listeria in Foods.
3. Ephros M, et al. Encephalopathy associated with enteroinvasive *Escherichia coli* 0144:NM infection. J Clin Microbiol 1996;34:2432–2434.
4. Grimont PAD, Weill F. Antigenic formulae of the *Salmonella* serovars. 9th ed. Paris: Institut Pasteur, 2007.
5. Rusconi B, et al. Whole genome sequencing for genomics-guided investigations of *Escherichia coli* O157:H7 outbreaks. Front Microbiol 2016;7:985.

**Supplementary Table 2.** The phenotypic and genotypic antimicrobial resistance patterns of *Salmonella enterica* subsp. *enterica* serovar Reading isolated from a cat and the raw pet food it was consuming.

| Antimicrobial agent         | Cat 1                           |                       |                                  | Food 2 genotypic resistance gene         |               |
|-----------------------------|---------------------------------|-----------------------|----------------------------------|------------------------------------------|---------------|
|                             | Fecal phenotypic interpretation | Fecal phenotypic MIC* | Fecal genotypic resistance genes | OH-16-8884-8                             | OH-16-8884-7  |
| Amikacin                    | S                               | ≤4                    |                                  | <i>aph(3'')-Ib</i> †, <i>aph(6)-Id</i> † |               |
| Amoxicillin–clavulanic acid | S                               | 1                     | <i>golS</i> †                    | <i>golS</i> †                            | <i>golS</i> † |
| Ampicillin                  | S                               | 1                     | <i>golS</i> †                    | <i>golS</i> †                            | <i>golS</i> † |
| Cefazolin                   | S                               | 2                     |                                  |                                          |               |
| Cefovecin                   | S                               | 2                     |                                  |                                          |               |
| Cefoxitin                   | S                               | 4                     |                                  |                                          |               |
| Cefpodoxime                 | S                               | ≤2                    |                                  |                                          |               |
| Cephalothin                 | S                               | 4                     |                                  |                                          |               |
| Chloramphenicol             | S                               | 8                     | <i>golS</i> †                    | <i>golS</i> †                            | <i>golS</i> † |
| Clindamycin                 | R                               | >4                    |                                  |                                          |               |
| Doxycycline                 | S                               | ≤2                    |                                  | <i>tet(A)</i>                            |               |
| Enrofloxacin                | S                               | ≤0.25                 |                                  |                                          |               |
| Erythromycin                | R                               | >4                    |                                  |                                          |               |
| Gentamicin                  | S                               | ≤1                    |                                  | <i>aph(3'')-Ib</i> †, <i>aph(6)-Id</i> † |               |
| Imipenem                    | S                               | ≤1                    |                                  |                                          |               |
| Marbofloxacin               | S                               | ≤0.25                 |                                  |                                          |               |
| Oxacillin + 2% NaCl         | R                               | >4                    | <i>golS</i> †                    | <i>golS</i> †                            | <i>golS</i> † |
| Penicillin                  | R                               | >8                    | <i>golS</i> †                    | <i>golS</i> †                            | <i>golS</i> † |

Whole genome sequencing to confirm pet foodborne illness

|                               |   |      |               |               |               |
|-------------------------------|---|------|---------------|---------------|---------------|
| Ticarcillin                   | S | ≤8   | <i>golS</i> † | <i>golS</i> † | <i>golS</i> † |
| Ticarcillin–clavulanic acid   | S | ≤8   | <i>golS</i> † | <i>golS</i> † | <i>golS</i> † |
| Trimethoprim–sulfamethoxazole | S | ≤0.5 |               | <i>sul2</i> ‡ |               |

R = resistant; S = susceptible.

\* Sensititre companion animal MIC plate (Thermo Fisher Scientific, Waltham, MA), expressed as µg/mL.

† ColpVC plasmid containing *golS* gene.

‡ IncQ1 plasmid containing the *aph(3'')-Ib*, *aph(6)-Id*, and *sul2* genes.
